# Supplementary material for: Narcolepsy Type 1 Is Associated with a Systemic Increase and Activation of Regulatory T Cells and with a Systemic Activation of Global T Cells
Source: PubMed Central journal article supplement (PMC5249232; doi:10.1371/journal.pone.0169836), 2017-01-20
Supplement: pone.0169836.s001.pdf [file pone.0169836.s001.pdf]

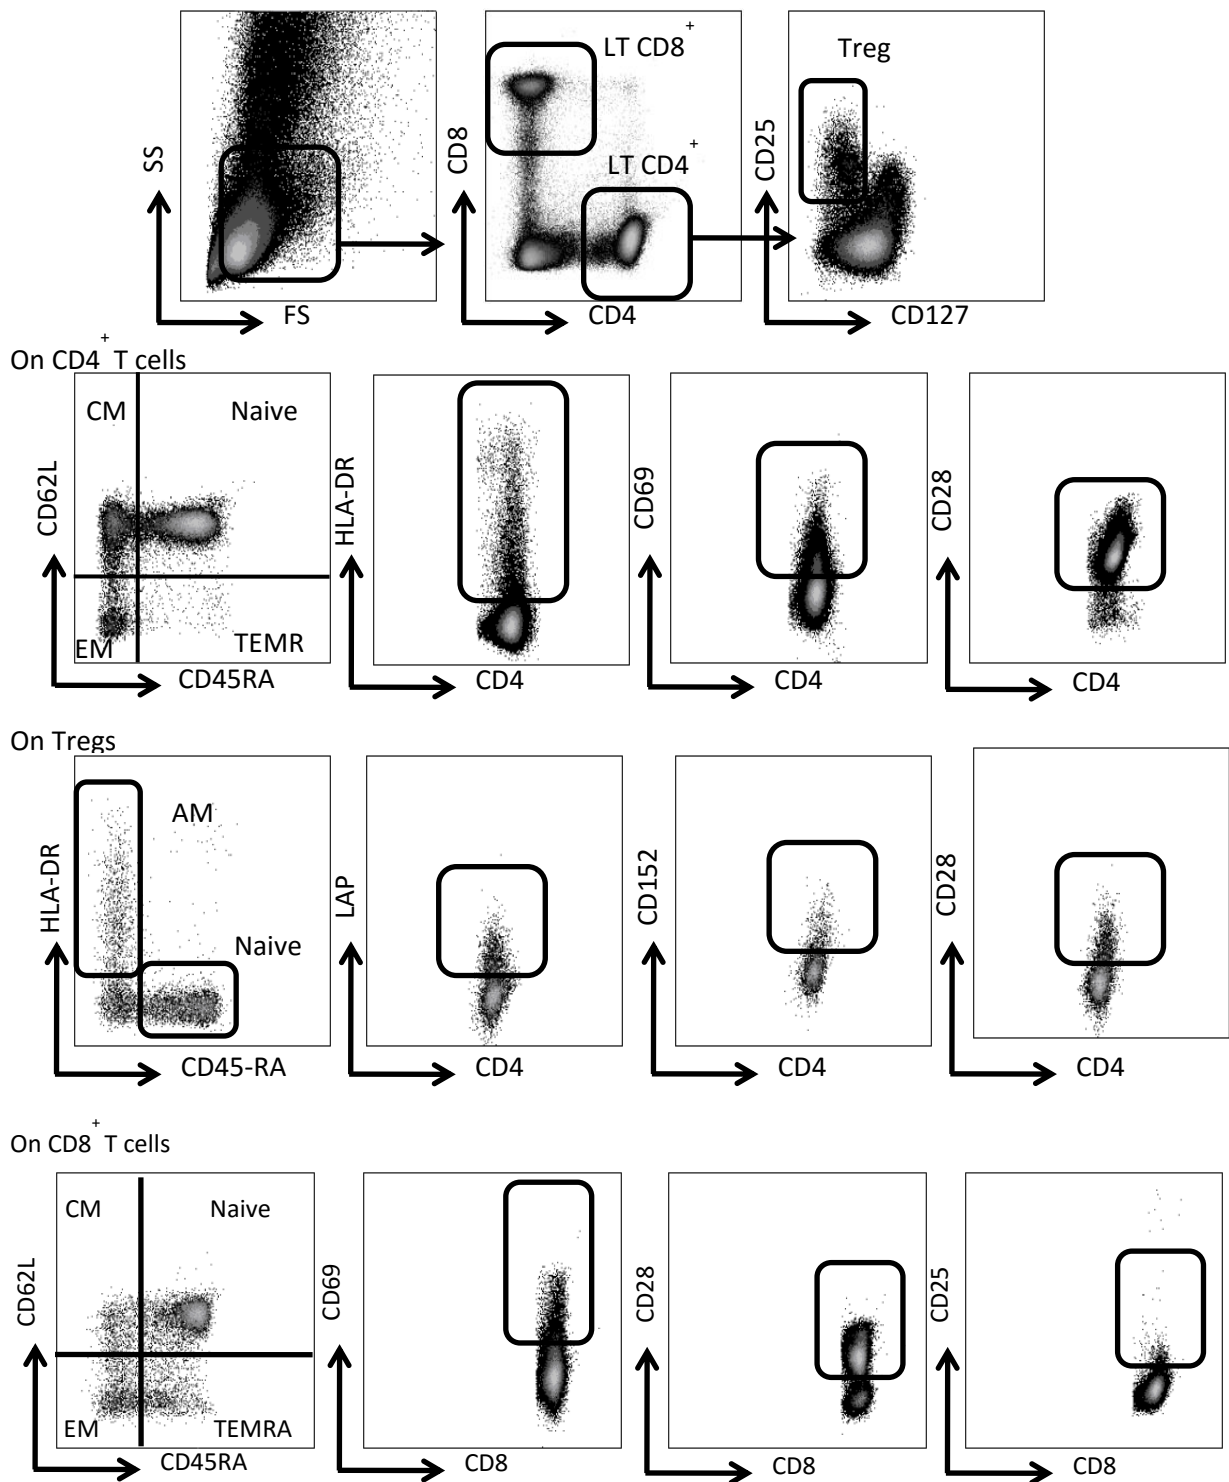

**S1 Fig. Representative flow cytometry analysis of CD4<sup>+</sup> and CD8<sup>+</sup> T cells and of CD4<sup>+</sup> Tregs from human fresh heparinized peripheral blood.** CD4<sup>+</sup> and CD8<sup>+</sup> T cells were gated from the lymphocytes gate. Naïve T cells were defined as CD45RA<sup>+</sup> CD62L<sup>+</sup> cells, central memory (CM) T cells as CD45RA<sup>-</sup> CD62L<sup>+</sup>, effector memory (EM) T cells as CD45RA<sup>-</sup> CD62L<sup>-</sup>, and terminally differentiated (TEMRA) T cells as CD45RA<sup>+</sup> CD62L<sup>-</sup>. Activated memory Tregs (AM) were defined as CD45RA<sup>-</sup> HLA-DR<sup>+</sup>.
