# Supplementary material for: Narcolepsy Type 1 Is Associated with a Systemic Increase and Activation of Regulatory T Cells and with a Systemic Activation of Global T Cells
Source: PubMed Central journal article supplement (PMC5249232; doi:10.1371/journal.pone.0169836), 2017-01-20
Supplement: pone.0169836.s002.pdf [file pone.0169836.s002.pdf]

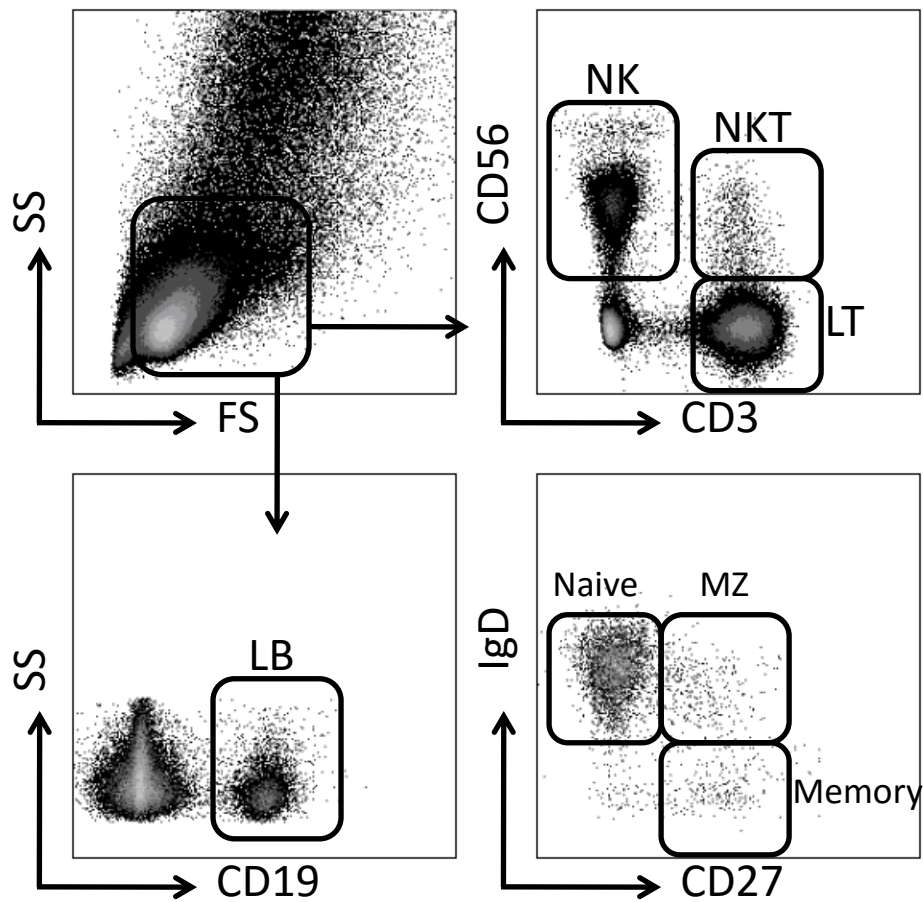

**S2 Fig. Representative flow cytometry analysis of B lymphocytes (LB) and NK cells from human fresh heparinized peripheral blood.** B cells and NK cells were gated from the lymphocytes gate. NK cells were defined as CD56<sup>+</sup> CD3<sup>-</sup> cells. NKT cells were defined as CD56<sup>+</sup> CD3<sup>+</sup> cells. T lymphocytes (LT) were defined as CD56<sup>-</sup> CD19<sup>-</sup> CD3<sup>+</sup> cells. Naïve B cells were defined as CD19<sup>+</sup> IgD<sup>+</sup> CD27<sup>-</sup> cells, memory B cells as CD19<sup>+</sup> IgD<sup>-</sup> CD27<sup>+</sup> cells, and marginal zone (MZ) B cells as CD19<sup>+</sup> IgD<sup>+</sup> CD27<sup>+</sup> cells. SS: side scatter, FS: Forward scatter.
