# Supplementary material for: Narcolepsy Type 1 Is Associated with a Systemic Increase and Activation of Regulatory T Cells and with a Systemic Activation of Global T Cells
Source: PubMed Central journal article supplement (PMC5249232; doi:10.1371/journal.pone.0169836), 2017-01-20
Supplement: pone.0169836.s003.pdf [file pone.0169836.s003.pdf]

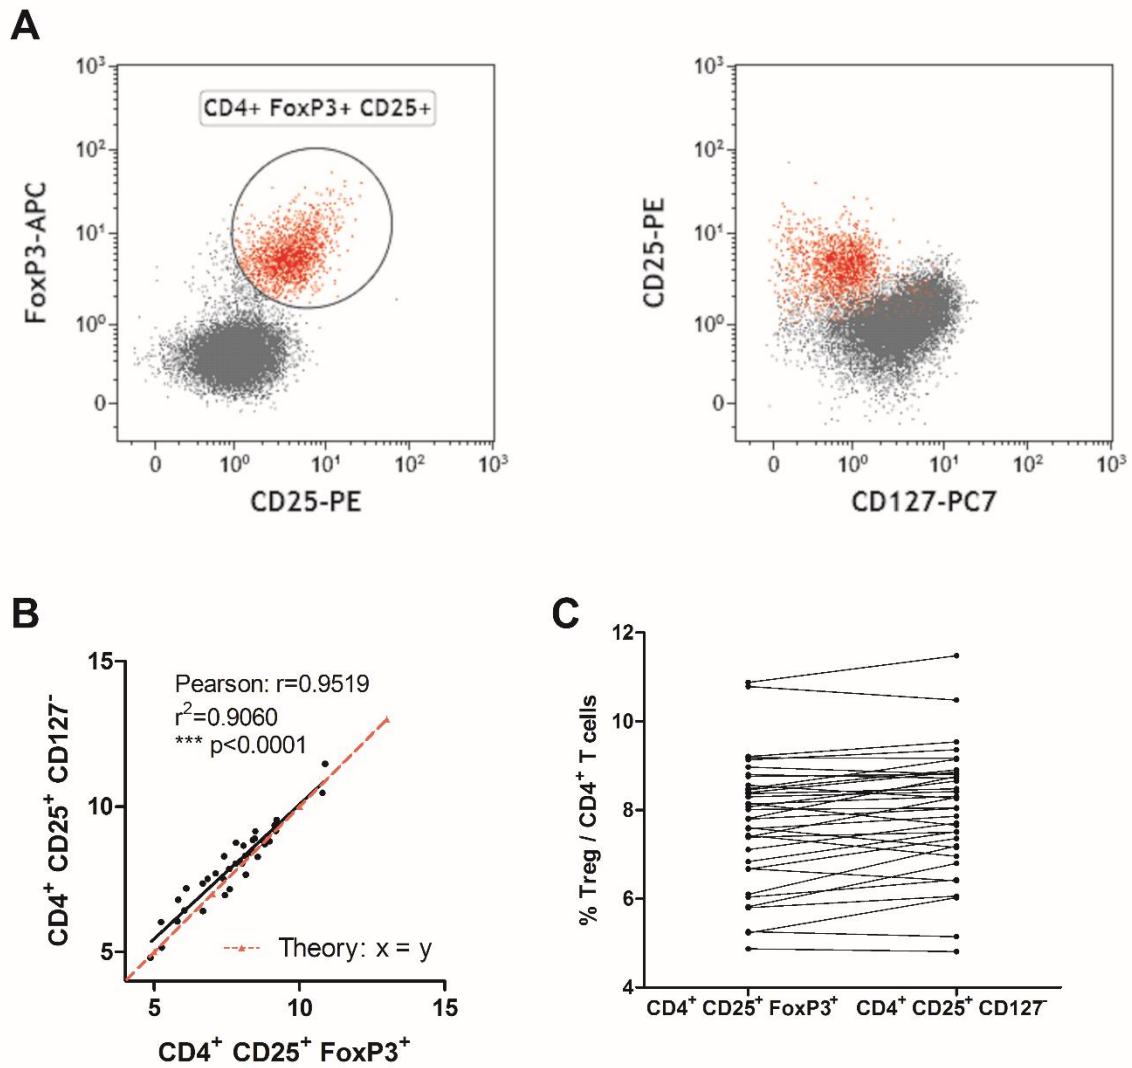

**S3 Fig. correlation between CD4<sup>+</sup> CD25<sup>+</sup> FoxP3<sup>+</sup> Treg and CD4<sup>+</sup> CD25<sup>+</sup> CD127<sup>-</sup> Treg**

A. Representative flow cytometry of Tregs (red) using CD4<sup>+</sup> CD25<sup>+</sup> FoxP3<sup>+</sup> gating, and the same Tregs (CD4<sup>+</sup> CD25<sup>+</sup> FoxP3<sup>+</sup>) (red) retro gated using CD25 and CD127 markers.

B. Correlation between CD4<sup>+</sup> CD25<sup>+</sup> FoxP3<sup>+</sup> Treg and CD4<sup>+</sup> CD25<sup>+</sup> CD127<sup>-</sup> Treg

C. Concordance between CD4<sup>+</sup> CD25<sup>+</sup> FoxP3<sup>+</sup> Treg and CD4<sup>+</sup> CD25<sup>+</sup> CD127<sup>-</sup> Treg
