# Supplementary material for: Narcolepsy Type 1 Is Associated with a Systemic Increase and Activation of Regulatory T Cells and with a Systemic Activation of Global T Cells
Source: PubMed Central journal article supplement (PMC5249232; doi:10.1371/journal.pone.0169836), 2017-01-20
Supplement: pone.0169836.s004.pdf [file pone.0169836.s004.pdf]

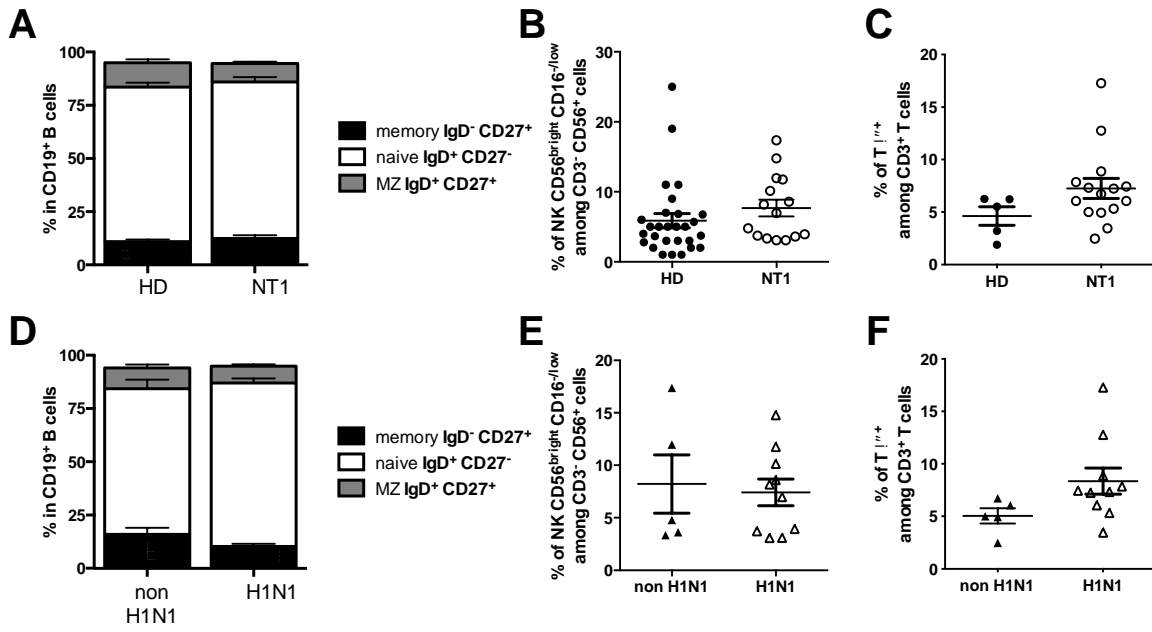

**S4 Fig. B cells, NK cells and T cells gamma delta phenotyping** according to NT1 status (respectively A, B and C), and to H1N1 status in NT1 patients (respectively D, E and F).
