# Supplementary material for: Narcolepsy Type 1 Is Associated with a Systemic Increase and Activation of Regulatory T Cells and with a Systemic Activation of Global T Cells
Source: PubMed Central journal article supplement (PMC5249232; doi:10.1371/journal.pone.0169836), 2017-01-20
Supplement: pone.0169836.s005.pdf [file pone.0169836.s005.pdf]

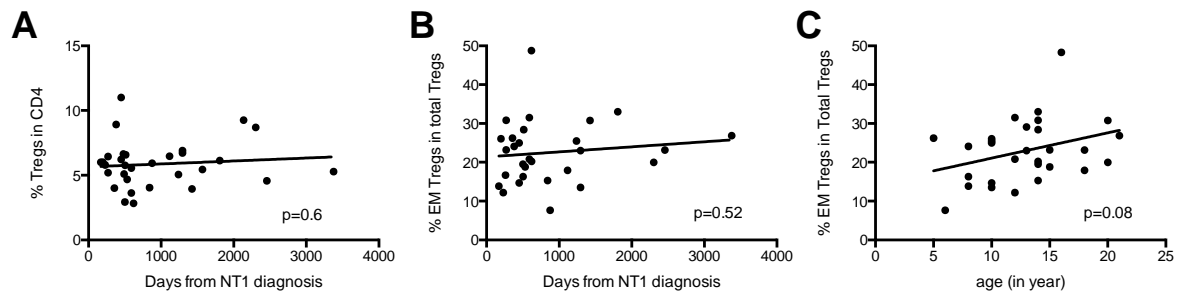

**S5 Fig. Influence of NT1 disease duration and age on Tregs frequency and Tregs memory.** Correlation between Tregs frequency and NT1 disease duration (A), between effector memory Tregs frequency and disease duration (B), and between effector memory Tregs frequency and age (C).
